# Supplementary figures and images for: A calix[4]pyrrole-based linear supramolecular polymer constructed by orthogonal self-assembly
Source: Royal Society of Chemistry journal article supplement (doi:10.1039/d1cc01003d), 2021-01-01

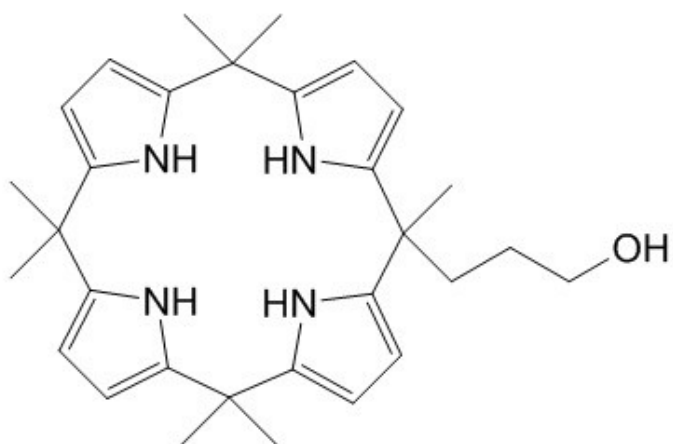

**1**

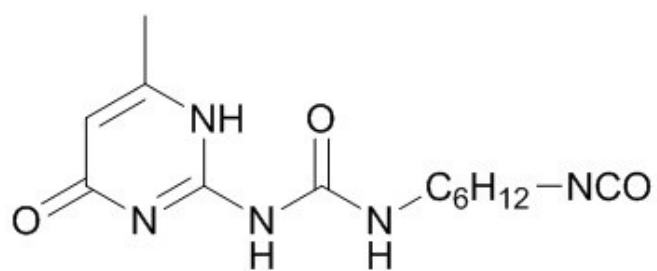

**2**

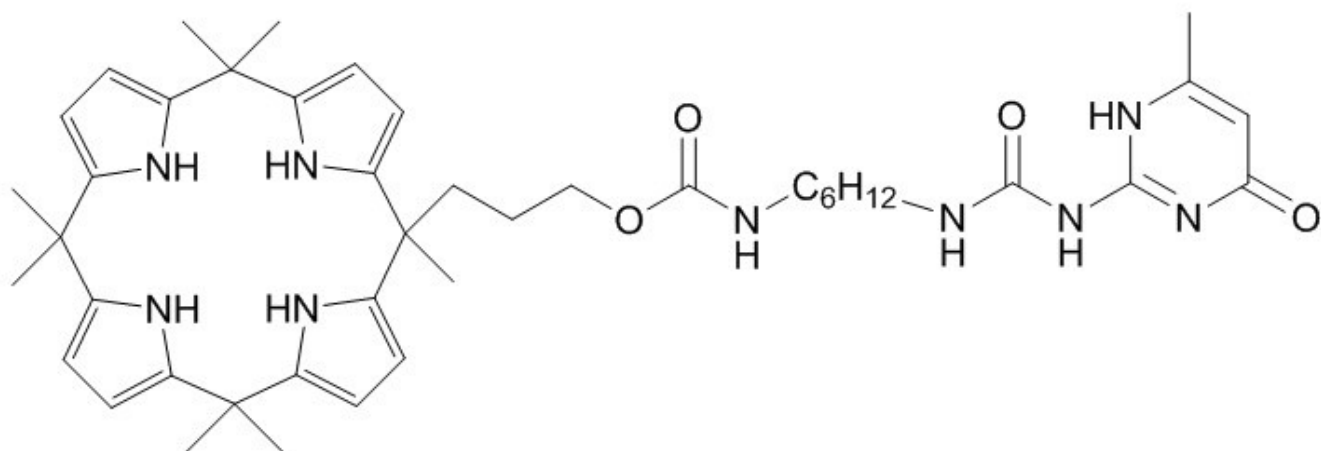

**UPyCP**

Supplement: d1cc01003d2.pdf [file d1cc01003d2.pdf]
